# Bilaterally Reduced Rolandic Beta Band Activity in Minor Stroke Patients

Joshua P. Kulasingham<sup>1</sup>, Christian Brodbeck<sup>2</sup>, Sheena Khan<sup>3</sup>, Elisabeth B. Marsh<sup>\*,3</sup> and Jonathan Z. Simon<sup>\*,1</sup>

<sup>1</sup> *Department of Electrical and Computer Engineering, University of Maryland, College Park, MD, USA*

<sup>2</sup> *Department of Psychological Sciences, University of Connecticut, CT, USA*

<sup>3</sup> *Department of Neurology, the Johns Hopkins School of Medicine, Baltimore MD, USA*

\* These authors contributed equally

Corresponding author: Joshua P. Kulasingham

Email: joshuapk@umd.edu

## Conflicts of Interest Statement

None of the authors have potential conflicts of interest to be disclosed

## Acknowledgements

This work was supported by an Innovative Research Grant through the American Heart Association (18IPA34170313) and National Science Foundation Grant SMA-1734892.

## Keywords

MEG, minor stroke, beta band power, rolandic beta, Event Related Synchronization

# **Abstract**

## **Objective**

Stroke patients with hemiparesis display decreased beta band (13-25 Hz) rolandic activity, correlating to impaired motor function. However, patients without significant weakness, with small lesions far from sensorimotor cortex, nevertheless exhibit bilateral decreased motor dexterity and slowed reaction times. We investigate whether these minor stroke patients also display abnormal beta band activity.

## **Methods**

Magnetoencephalographic (MEG) data were collected from nine minor stroke patients (NIHSS < 4) without significant hemiparesis, at ~1 and ~6 months postinfarct, and eight age-similar controls. Rolandic relative beta power during matching tasks and resting state, and Beta Event Related (De)Synchronization (ERD/ERS) during button press responses were analyzed.

## **Results**

Regardless of lesion location, patients had significantly reduced relative beta power and ERS compared to controls. Abnormalities persisted over visits, and were present in both ipsi- and contra-lesional hemispheres, consistent with bilateral impairments in motor dexterity and speed.

## **Conclusions**

Minor stroke patients without severe weakness display reduced rolandic beta band activity in both hemispheres, which may be linked to bilaterally impaired dexterity and processing speed, implicating global connectivity dysfunction affecting sensorimotor cortex.

## Significance

Rolandic beta band activity may be a potential biomarker and treatment target, even for minor stroke patients with small lesions far from sensorimotor areas.

## Highlights

- Minor stroke patients have significantly reduced rolandic beta activity
- Reduction is independent of lesion location and stable over 6 months post-stroke
- Findings suggest small lesions may lead to global network dysfunction

## 1. Introduction

Motor impairment is present in many stroke survivors (Kelly-Hayes et al., 2003), but does not always take the form of significant weakness. Patients with “minor stroke” and low National Institute of Health Stroke Scale (NIHSS) scores can exhibit normal strength but have disabling deficits manifesting as slowed response times and limited dexterity. This is common even in high functioning patients (Platz et al., 1999). Unlike hemiparesis, the underlying neural mechanisms for these processes are less well understood. These minor stroke patients also report difficulty with concentration and attention which, paired with decreased motor dexterity and slowed response times, hinder their ability to successfully return to work and reintegrate back into society. Previously, we found that such patients have low amplitude responses to visual stimuli that are temporally dispersed, possibly indicating a disruption of cortical networks (Marsh et al., 2020). In this study we investigate neural responses in the sensorimotor cortex of the same cohort of minor stroke patients compared to age-similar controls, to determine if they display

abnormal beta band activity, possibly linked to mechanisms underlying reduced motor dexterity and slowed response times.

Measurements of cortical activity using electroencephalography (EEG) or magnetoencephalography (MEG) indicate that rolandic beta band (13-25 Hz) responses are intricately linked to motor function (Cheyne, 2013; Hari et al., 1998; Tzagarakis et al., 2010). Spontaneous rolandic beta band activity may reflect multiple functional mechanisms in sensorimotor cortex including intracortical inhibition, communication, motor imagery and motor planning (Kilavik et al., 2013; Pfurtscheller et al., 2005, 1996). Abnormal beta band activity has been observed in stroke (Rossiter et al., 2014; Shiner et al., 2015), Parkinson's disease (Heinrichs-Graham et al., 2014) and other sensorimotor disorders (Leocani and Comi, 2006). Stroke patients with motor deficits have been found to display reduced beta responses, especially in the ipsi-lesional hemisphere, possibly due to abnormal disinhibition and increased excitation (Tecchio et al., 2005). It is well established that beta band activity reduces during movement planning and execution (Event Related Desynchronization or ERD), and increases afterwards (Event Related Synchronization or ERS) in sensorimotor cortex (Kilavik et al., 2013; Pfurtscheller et al., 1996; Pfurtscheller and Lopes da Silva, 1999). Although the neural mechanisms involved in these changes are not clear, prior work suggests that beta ERD may reflect cortical excitability and downregulation of inhibition while ERS may reflect active inhibition or a return to status quo after movement (Engel and Fries, 2010; Solis-Escalante et al., 2012; Takemi et al., 2013). Stroke patients with hemiparesis have decreased beta ERD/ERS, with a greater reduction in the ipsi-lesional hemisphere (Parkkonen et al., 2018; Rossiter et al., 2014) and abnormal cortical patterns and latencies (Tang et al., 2020). However, it is unclear

whether patients with small lesions without significant hemiparesis, would also display such abnormalities in beta band activity and beta ERD/ERS.

This study involved MEG data collected from stroke patients with small lesions with minor impairments in motor dexterity, and was motivated by several research questions. Firstly, we address whether even these minor stroke patients displayed abnormal rolandic beta activity compared to controls using relative beta power and beta ERD/ERS during button press responses. Next, we explore whether any abnormalities improve with time, using a subset of the patient cohort who returned for a second visit ~6 months later. Finally, we investigate whether the lesion location influences beta band activity by separately analyzing responses in ipsi- and contra-lesional hemispheres.

## **2. Methods**

### **2.1. Subject Population**

Nine patients with minor acute ischemic stroke 4-6 weeks postinfarct, and eight age-similar controls without history of prior stroke were recruited for this MEG study (abnormalities in visual evoked responses from this population was reported in our previous study Marsh et al., 2020). The study was approved by the Johns Hopkins University institutional review board and all participants provided written informed consent. Patients with severe hemiplegia or aphasia, large vessel occlusions (M1 and M2 branches), prior history of dementia, incompletely treated psychiatric disease or uncorrected vision or hearing loss were excluded. Clinical scores NIHSS (Brott et al., 1989), Modified Rankin Scale (mRS; Rankin, 1957), Barthel Index (Wade and Collin, 1988) and cognitive tests Montreal Cognitive Assessment (MoCA; Nasreddine et al.,

2005), and F-A-S verbal fluency test (Bush, 2011) were assessed. Along with clinical examination to assess strength, patients performed the grooved peg board test as a measure of motor speed and dexterity (Ashendorf et al., 2009). Six patients and six controls returned for a 2<sup>nd</sup> visit ~6 months postinfarct, before recruitment was halted due to the COVID-19 pandemic. A detailed description of patient characteristics is provided in Table 1. More details about the patient population, lesion locations and clinical measures are provided in our previous work (Marsh et al., 2020).

**Table 1. Clinical and Behavioral Measures**

| Patient | Lesion |       |      | Acute | First visit |     |      |       |       | Second visit |     |      |      |       | Difference (Second - First) |      |      |      |      |
|---------|--------|-------|------|-------|-------------|-----|------|-------|-------|--------------|-----|------|------|-------|-----------------------------|------|------|------|------|
|         | loc.   | hemi. | size |       | NIHSS       | mRS | MoCA | GPBi  | GPBc  | NIHSS        | mRS | MoCA | GPBi | GPBc  | NIHSS                       | mRS  | MoCA | GPBi | GPBc |
| 1       | SC     | L     | 10.5 | 4     | 0           | 1   | 24   | -1.5  | -3.6  | 0            | 1   | 26   | -2.8 | -0.6  | 0                           | 0    | 2    | -1.3 | 3    |
| 2       | SC     | L     | 2    | 0     | 0           | 1   | 26   | -3.3  | -3.5  | 0            | 0   | 27   | -4.1 | -5.2  | 0                           | -1   | 1    | -0.8 | -1.7 |
| 3       | SC     | R     | 1.6  | 3     | 3           | 1   | 21   | -5    | -14.9 | 0            | 1   | 20   | -8.4 | -14.1 | -3                          | 0    | -1   | -3.4 | 0.8  |
| 4       | S      | R     | 0.4  | 2     | 2           | 1   | 24   | -15.7 | -14.1 | 0            | 0   | 29   | -0.4 | -1.1  | -2                          | -1   | 5    | 15.3 | 13   |
| 5       | S      | R     | 0.3  | 1     | 0           | 0   | 28   | -7.8  | -9.3  | 1            | 1   | 30   | -3.2 | -12.1 | 1                           | 1    | 2    | 4.6  | -2.8 |
| 6       | S      | R     | 6.8  | 3     | 0           | 1   | 28   | -2.1  | -6.1  | 0            | 0   | 27   | -0.8 | -4.5  | 0                           | -1   | -1   | 1.3  | 1.6  |
| 7       | S      | R     | 1.3  | 12    | 0           | 1   | 28   | -0.9  | -1.7  |              |     |      |      |       |                             |      |      |      |      |
| 8       | S      | L     | 2    | 4     | 1           | 2   | 22   | -4.5  | -3.2  |              |     |      |      |       |                             |      |      |      |      |
| 9       | C      | L     | 0.7  | 1     | 0           | 1   | 27   | -14.8 | -1.9  |              |     |      |      |       |                             |      |      |      |      |
| mean    |        |       | 2.8  | 3.3   | 0.7         | 1   | 25.3 | -6.2  | -6.5  | 0.2          | 0.5 | 26.5 | -3.3 | -6.3  | -0.6                        | -0.3 | 1.3  | 2.6  | 2.3  |
| SD      |        |       | 3.5  | 3.5   | 1.1         | 0.5 | 2.7  | 5.6   | 5.1   | 0.4          | 0.5 | 3.5  | 2.9  | 5.6   | 1.5                         | 0.8  | 2.3  | 6.8  | 5.6  |

loc.: location of lesion S=subcortical, C=cortical, SC=subcortico-cortical; hemi.: lesion hemisphere; size: lesion volume in cc; GPBi: Grooved Peg Board ipsi-lesional hand reaction time (units in s.d. from the population average); GPBc: Grooved Peg Board contra-lesional hand reaction time. Patients show abnormal GPB scores bilaterally that improve but remain impaired for the 2<sup>nd</sup> visit.

## 2.2. Experiment Design

To investigate neural responses during motor activity, MEG data was collected while subjects performed picture-word matching tasks with button responses. A full description of each subtask

is provided in our previous work (Marsh et al., 2020). In brief, in each trial, subjects saw an image, followed 4 seconds later by a word and were asked to quickly and accurately press a button to indicate if the word corresponded to the image (yes: left button, no: right button). Reaction times were measured from the time the word first appeared on the screen to the time the participant pushed the response button. Across subtasks, subjects completed a total of 186 trials. Resting state data were also acquired in order to investigate if baseline beta band activity was different in patients versus controls. Resting state magnetic fields were recorded for ~1-2 minutes while the subjects rested with eyes open and fixated on a cross projected onto a screen ~2 feet in front of them.

### **2.3. MEG recording and preprocessing**

MEG data was recorded using a 157 axial gradiometer whole head MEG system (Kanazawa Institute of Technology, Nonoichi, Ishikawa, Japan) while subjects rested in the supine position in a magnetically shielded room (VAC, Hanau, Germany). The data was recorded at a sampling rate of 1 kHz with a 200 Hz low pass filter, and a 60 Hz notch filter. All subsequent analyses were performed in mne-python (Gramfort, 2013; Gramfort et al., 2014), eelbrain (Brodbeck, 2020) and R software (R Core Team, 2020). Saturating channels were excluded and the data was denoised using temporal signal space separation (Taulu and Simola, 2006) to remove external noise. The MEG data was filtered from 1–40 Hz using an FIR filter (mne-python default settings), downsampled to 200 Hz, and independent component analysis was used to remove artifacts such as eye blinks, heartbeats, and muscle movements.

## **2.4. Neural source localization**

The head shape of each subject was digitized using a Polhemus 3SPACE FASTRAK system, and head position was measured before and after the experiment using five marker coils. The marker coil locations and the digitized head shape were used to co-register the template FreeSurfer ‘fsaverage’ brain (Fischl, 2012) using rotation, translation and uniform scaling. Single trial MEG data was source localized in the ‘ico-4’ surface source space, with current direction constrained to currents orthogonal to the white matter surface, using an inverse operator computed via Minimum Norm Estimation (MNE) (Hämäläinen and Ilmoniemi, 1994), and a noise covariance estimated from empty room data. Neural sources in and around the pre- and post-central gyri were selected as the rolandic Region of Interest (ROI), using the ‘aparc’ parcellation labels ‘precentral’ and ‘postcentral’ (Desikan et al., 2006; see Fig. 1A).

## **2.5. Frequency domain analysis**

The source localized continuous MEG data during each picture-word matching task and the resting state was segregated into 15-second intervals. For each interval, the power spectral density was computed using Welch’s method (FFT length = 256 samples, with 50% overlap) and averaged across all segments and neural sources in the ROI. To account for individual variability in baseline frequency power, the relative beta power was computed by dividing the power in the beta range of 13-25 Hz by the total power in the range of 2-40 Hz. These relative beta powers were averaged across subtasks, log-transformed and were used for subsequent statistical analysis.



## 2.6. Event related (de-)synchronization analysis

The source localized MEG data in the rolandic ROI were epoched -3 to 3 seconds before and after the response button was pushed during the picture-word matching tasks. The time-frequency spectrograms for these trials were computed using Morlet wavelets (20 frequency bands with log-spacing in the range of 6-35 Hz with the number of cycles in each band being equal to half the center frequency). The beta ERD was computed as the percentage *decrease* in average beta (13-25 Hz) power in the time range of -1 s to 0.5 s relative to the button-press, compared to the baseline average beta power (time range -2.9 s to -2 s), consistent with established methods (Kilavik et al., 2013). The beta ERS was computed in a similar manner, as the percentage *increase* in average beta power over the baseline in the time range 0.5 s to 2.5 s. The trial averaged ERD/ERS values for each subject (averaged across subtasks) were used for subsequent statistical analysis.

## 2.7. Statistical analysis

The behavioral measures (reaction times and grooved peg board scores) were compared across patients and controls using t-tests with Bonferroni corrections for both the 1<sup>st</sup> visit (9 patients) and the 2<sup>nd</sup> visit (6 patients). Additionally, t-tests were used within the patient population to investigate if there were lateralization effects based on lesion hemisphere (ipsi- or contra-lesional sides). Correlations between behavioral and beta band measures were not investigated since there were no strong trends present during initial analysis.

To investigate group differences between patients and controls, the relative beta power in the rolandic ROI was analyzed with a linear mixed effects model using the ‘lme4’ package in R (Kuznetsova et al., 2017), since these models are capable of accounting for individual variation using random effects and for missing data (for this dataset, several subjects were not present for a 2<sup>nd</sup> visit). This model was also used to test changes across visits, and across the picture-word matching tasks and resting state data. The dependent variable is relative beta log-power, with fixed effects of group (‘control’ or ‘patient’), task (‘matching’ or ‘resting’), and visit (‘1st’ or ‘2nd’) and a random intercept by subject. The full model with all interactions was tested for a significant difference over the reduced model without the highest-level interaction (group  $\times$  task  $\times$  visit) using the ‘drop1’ function in the lmerTest package in R, which performs a Type II ANOVA with the degrees of freedom estimated using Satterthwaite’s method (Satterthwaite, 1946). If the 3-way interaction was not significant, it was dropped from the model and the new model consisted of the 2-way interaction terms and the main effects. The same procedure with ‘drop1’ was used to check for significant interactions in this new model. If none of the 2-way interaction terms were significant, the final model only consisted of main effects.

To investigate possible hemispheric differences due to lesion hemisphere in the patient population, the beta log-power was separated by hemisphere, and paired two-tailed t-tests were used to test for a significant difference between the ipsi- and contra-lesional hemispheres. Separate t-tests with Bonferroni correction were performed for the 1<sup>st</sup> visit (9 patients) and the 2<sup>nd</sup> visit (6 patients).

A linear mixed effects model was also used to investigate group differences and changes across visits. This model had fixed effects of group, visit, and metric ('ERD', 'ERS') and random intercepts by subject. The same procedure as above was used to fit the models and determine significant interactions and effects, starting with the full model including the 3-way interaction. Finally, hemispheric differences in ERS and ERD due to lesion location were investigated within the patient population using paired two-tailed t-tests with Bonferroni correction for the 1<sup>st</sup> and 2<sup>nd</sup> visits similar to the above.

### 3. Results

#### 3.1. Behavioral outcomes

Nine patients with minor stroke and eight age-similar controls without prior history of stroke were recruited for this study. The clinical scores for all patients were low at both visits (mean [SD] NIHSS 1<sup>st</sup> visit: 0.7 [1.1]; NIHSS 2<sup>nd</sup> visit: 0.2 [0.4], mRS 1<sup>st</sup> visit: 1 [0.5], 2<sup>nd</sup> visit: 0.5 [0.5], see Table 1). Patients were bilaterally slow on the Grooved Peg Board task for both visits as shown in Table 1 (reaction time in units of SD from the mean, ipsi-lesional 1<sup>st</sup> visit: -6.2 [5.6], 2<sup>nd</sup> visit: -3.3 [2.9]; contra-lesional 1<sup>st</sup> visit: -6.5 [5.1], 2<sup>nd</sup> visit: -6.3 [5.6]). There were no significant differences between ipsi- and contra-lesional sides in the Grooved Peg Board task performance (1<sup>st</sup> visit:  $t(8) = -0.15$ ,  $p = 0.88$ ; 2<sup>nd</sup> visit:  $t(5) = -1.84$ ,  $p = 0.12$ ). The reaction times for the picture-word matching tasks were significantly longer for patients compared to controls for the first visit (mean [SD] Controls = 1.04 [0.44] s, vs. Patients = 2.17 [1.75] s; independent t-test on the reciprocal of the reaction times  $t(15) = 2.51$ , corrected  $p = 0.046$ , Cohen's  $d = 1.3$ ). Although reaction times decreased in both patients and controls for the 2<sup>nd</sup> visit, there was no significant difference in the reaction time between the two visits (per subject difference between

first and second visit: Controls = 62 ms [143 ms], Patients = -99 ms [318 ms]), and reaction times were still significantly different across groups for the 2<sup>nd</sup> visit ( $t(10) = 2.72$ , corrected  $p = 0.04$ , Cohen's  $d = 1.72$ ). There was also no difference in reaction times for the ipsi- and contra-lesional button presses in patients (1<sup>st</sup> visit:  $t(8) = 0.88$ ,  $p = 0.4$ ; 2<sup>nd</sup> visit:  $t(5) = -0.95$ ,  $p = 0.39$ ). Further details on reaction times for each subtask are provided in our previous work (Marsh et al., 2020).

### 3.2. Beta power analysis

The MEG data during the picture-word matching tasks and resting state were source localized to the rolandic ROI and the (log-transformed) relative power in the beta frequency range of 13-25 Hz was computed (see Fig. 1). A linear mixed effects model with fixed effects group ('patient' or 'control'), visit ('1<sup>st</sup>' or '2<sup>nd</sup>') and task ('matching' or 'resting') and a random intercept by subject revealed a significant main effect of group ( $F(1,15) = 6.44$ ,  $p = 0.022$ ), but no other significant main effects (visit:  $F(1,39) = 0.68$ ,  $p = 0.41$ ; task:  $F(1,39) = 0.71$ ,  $p = 0.40$ ) or interactions (group  $\times$  visit:  $F(1,36) = 0.07$ ,  $p = 0.78$ ; group  $\times$  task:  $F(1,36) = 0.006$ ,  $p = 0.94$ ; visit  $\times$  task:  $F(1,36) = 0.92$ ,  $p = 0.34$ ; group  $\times$  visit  $\times$  task:  $F(1,35) = 1.14$ ,  $p = 0.29$ ). A post-hoc t-test averaged over tasks and visits revealed that controls had significantly higher relative beta power than patients ( $t(15) = 2.53$ ,  $p = 0.022$ , Cohen's  $d = 1.31$ ).

The effect of lesion hemisphere on the patients' beta activity was investigated by separating the relative beta power into ipsi- and contra-lesional hemispheres. The relative beta power was not significantly different across the hemispheres for either the 1<sup>st</sup> visit (picture-word matching:  $t(8) = 0.49$ ,  $p = 0.63$ ; resting:  $t(8) = 0.72$ ,  $p = 0.49$ ) or the 2<sup>nd</sup> visit (picture-word matching:  $t(5) = 0.8$ ,  $p = 0.45$ ; resting:  $t(5) = 0.43$ ,  $p = 0.68$ ). Overall, patients had significantly reduced relative beta

power for both the picture-word matching and resting tasks that did not improve for the 2<sup>nd</sup> visit, and was independent of lesion hemisphere.

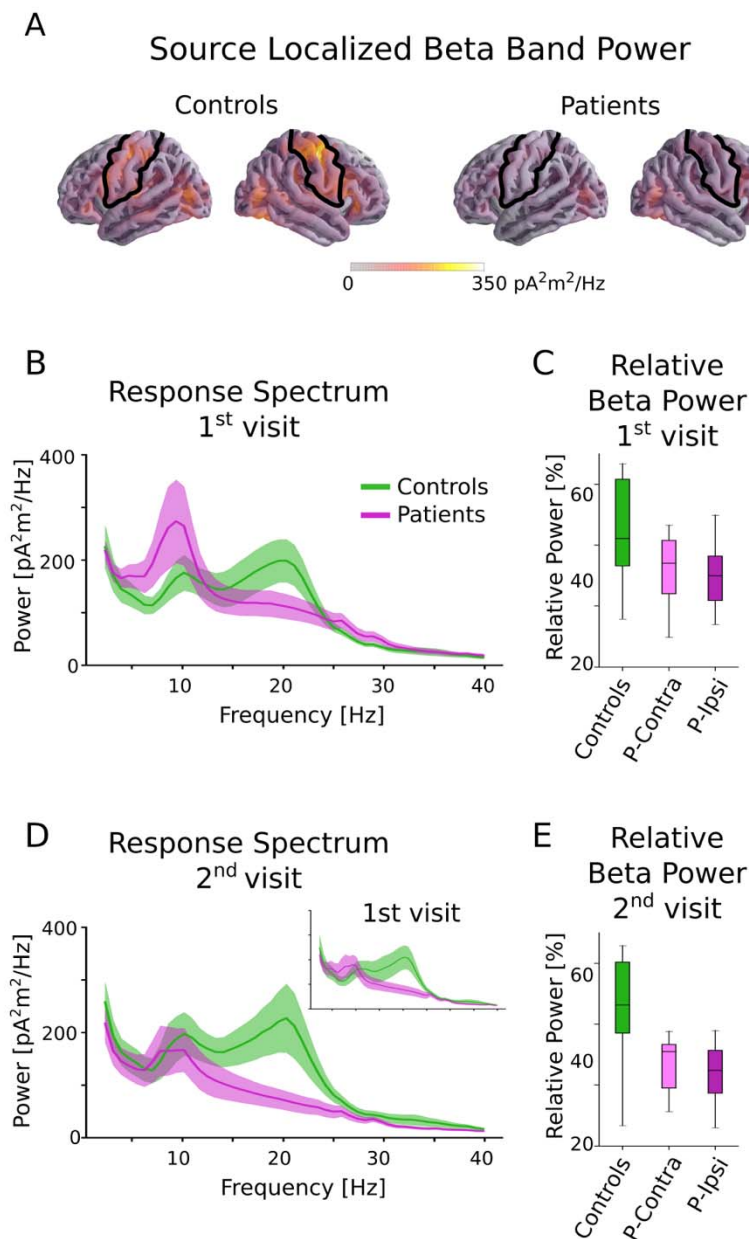

**Figure 1. Beta power in controls and patients.** **A.** Source localized beta band power for controls and patients averaged across all tasks. The black outline indicates the ROI used for all further analysis. Although patients and controls have similar beta activity in occipital areas, controls have much stronger activity in the rolandic ROI. **B.** Power spectral density of patients and controls averaged across all tasks in the central ROI for the 1<sup>st</sup>

visit. There is a clear group difference in the beta range (13-25 Hz). **C.** Relative beta power for controls and patients for the 1<sup>st</sup> visit, separated by ipsi-lesional and contra-lesional hemispheres. Clear differences between controls and patients are seen, but there are no notable differences within patients between ipsi-lesional and contra-lesional hemispheres. **D.** Power spectral density for the 2<sup>nd</sup> visit. Note that only a subset of subjects returned for the 2<sup>nd</sup> visit. The 1<sup>st</sup> visit spectrum averaged across only this subset of subjects is shown as an inset for comparison. **E.** Relative beta power for controls and patients for the 2<sup>nd</sup> visit, separated by ipsi-lesional and contra-lesional hemispheres. Patients show reduced power even after ~6 months postinfarct. There are no notable differences within patients for ipsi- and contra-lesional hemispheres.

### 3.3. Event Related (De)Synchronization Analysis

Beta ERS and ERD were calculated for the button responses during the picture-word matching tasks using Morlet wavelet spectrograms (see Fig. 2; details in Methods). A linear mixed effects model for beta ERS/ERD with fixed effects group, visit, and metric ('ERS' or 'ERD') and a random intercept per subject was used to detect significant effects. The 3-way interaction was not significant (group  $\times$  metric  $\times$  visit  $F(1,35) = 0.64$ ,  $p = 0.43$ ). However, there was a significant interaction of group  $\times$  metric ( $F(1,36) = 16.2$ ,  $p < 0.001$ ) as well as significant main effects of group ( $F(1,15) = 7.55$ ,  $p = 0.015$ ) and metric ( $F(1,39) = 29.3$ ,  $p < 0.001$ ). The other terms involving visit were not significant (group  $\times$  visit:  $F(1,40) = 0.28$ ,  $p = 0.6$ ; visit  $\times$  metric:  $F(1,36) = 0.08$ ,  $p = 0.76$ ; main effect of visit:  $F(1,45) = 0.05$ ,  $p = 0.82$ ). The significant interaction involving group and metric was analyzed further using post-hoc independent two-tailed t-tests with Bonferroni correction on the ERD and ERS averaged across visits. This revealed that patients had significantly lower ERS compared to controls (mean [SD] controls = 81.7 [35.9] %, patients = 40 [28.6] %,  $t(15) = 2.59$ , corrected  $p = 0.040$ , Cohen's  $d = 1.34$ ). Although the ERD also showed a similar trend, with controls being larger than patients, this

difference was not significant (controls = 31.1 [9.9] %, patients = 25.7 [9.5] %,  $t(15) = 1.15$ , corrected  $p = 0.53$ ).

To avoid the confound of ERS/ERD effects being driven by group differences during the baseline time-period (denominator in ERS/ERD calculations), the baseline beta power was calculated separately and was found to be not significantly different across groups (independent t-test  $t(15) = 1.12$ ,  $p = 0.28$ ). However, the beta power *relative* to total power in 2-40 Hz in the baseline time-period *was* significantly different between groups (independent t-test  $t(15) = 2.5$ ,  $p = 0.02$ ), in line with the reduction of spontaneous relative beta power in patients as shown in Fig. 1.

Finally, differences due to lesion location were tested by separating the ERD/ERS into ipsi- and contra-lesional hemispheres. There were no significant differences between the ipsi- and contra-lesional hemispheres within patients (ERD 1<sup>st</sup> visit:  $t(8) = 0.22$ ,  $p = 0.82$ ; ERD 2<sup>nd</sup> visit:  $t(5) = -0.34$ ,  $p = 0.74$ ; ERS 1<sup>st</sup> visit:  $t(8) = 0.71$ ,  $p = 0.49$ ; ERS 2<sup>nd</sup> visit:  $t(5) = -0.52$ ,  $p = 0.62$ ). Overall, patients had significantly lower ERS (but not ERD), in a manner that was consistent across tasks and visits and independent of lesion hemisphere.

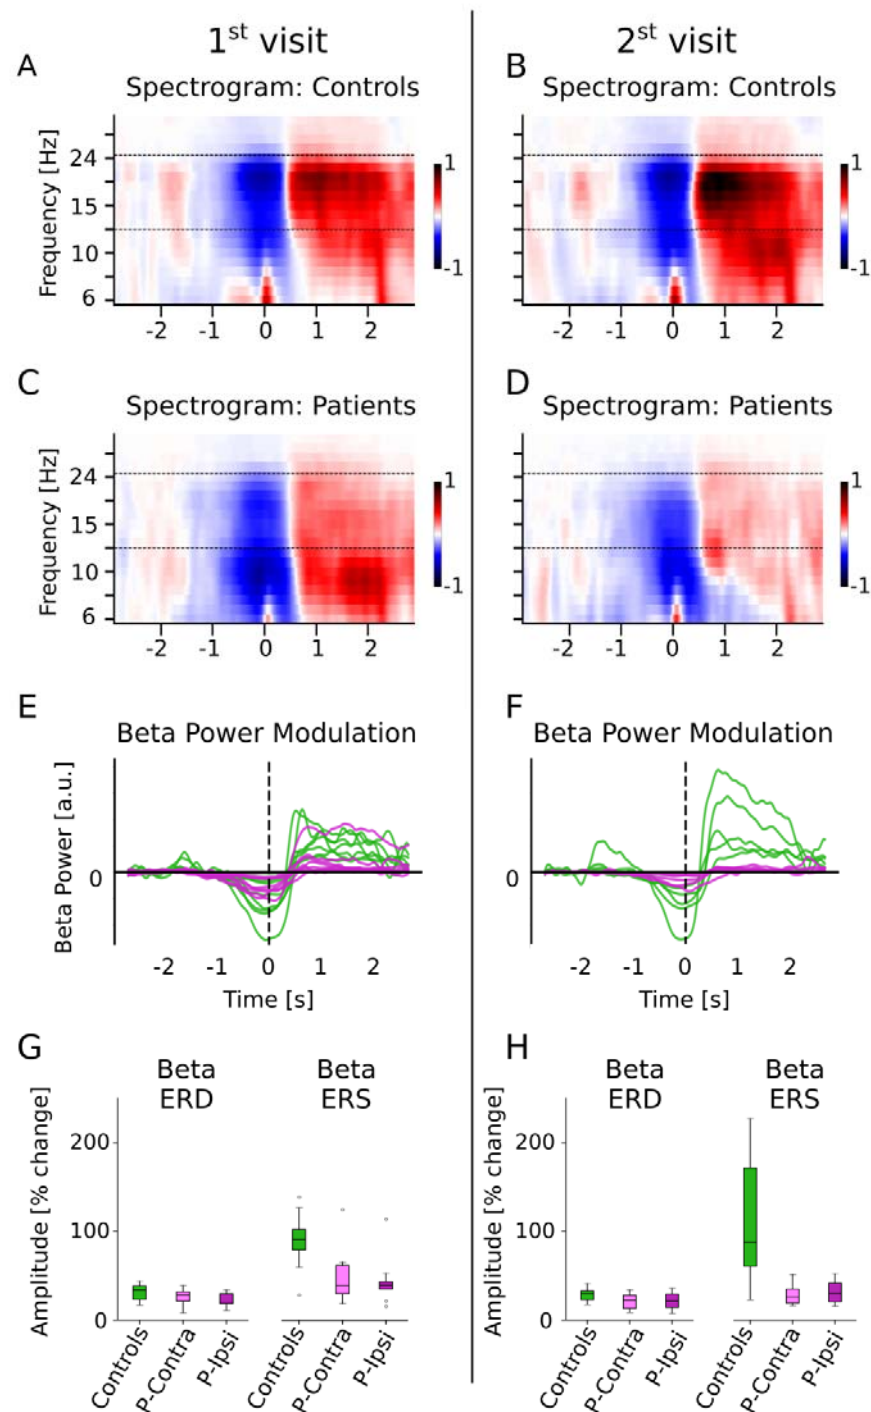

**Figure 2. Beta ERD and ERS for controls and patients.** **A, B, C, D.** The spectrograms for controls and patients (normalized w.r.t. baseline activity) are shown. The movement (button press) occurred at time  $t = 0$ . The dashed line indicates the beta band (13-25 Hz) that was used for further analysis. **E, F.** Beta power



modulation per subject, computed as the average power in the beta band. Patients have reduced beta ERD/ERS. **G, H.** Beta ERD/ERS (% change from baseline) for controls and patients, separated by ipsi- and contra-lesional hemispheres. Patients have reduced ERD and ERS compared to controls for both visits, but show no differences across hemispheres. The group difference is much larger for the ERS than for the ERD.

## 4. Discussion

Minor stroke patients displayed reduced beta activity in rolandic areas compared to controls, both during picture-word matching tasks and resting state. Although these patients did not have significant motor impairment or hemiparesis, they reported difficulties with concentration, attention and an overall slowness combined with a reduction of motor dexterity, that hinders their ability to reintegrate well into society. We found that their rolandic beta activity was reduced bilaterally, independent of lesion hemisphere, and did not greatly improve with time. This is consistent with bilaterally slower reaction times and impaired grooved peg board scores that improved but remained below the normative average for their second visit. Interestingly, group differences in beta ERS were much larger than in beta ERD. A similar pattern of persistently reduced visual evoked responses was found in the same patient cohort in our previous study (Marsh et al., 2020). Overall, these results suggest a more global disruption, not tied to lesion location, possibly involving long range cortical networks or a global excitation/inhibition imbalance, even for patients with only minor strokes.

### 4.1. Reduced beta activity in patients compared to controls

Minor stroke patients had significantly reduced relative beta power compared to controls in rolandic areas regardless of task. Although the beta ERD and ERS would be a significant

component of the overall relative beta power during the picture-word matching tasks that involved button responses, we also found differences in relative beta power during the baseline period, which would not involve button press related motor beta activity. Spontaneous beta oscillations during resting were also reduced, consistent with prior work (Tecchio et al., 2005). This indicates that minor stroke patients have abnormal beta oscillations even without active movement.

#### **4.2. Reduced beta ERS/ERD in patients compared to controls**

Both beta ERS and ERD were reduced on average in minor stroke patients compared to controls, though only the ERS showed a significant difference. Prior studies have shown abnormal latencies, amplitudes and cortical patterns for both beta ERD and ERS in stroke patients with motor impairments (Eder et al., 2006; Monge-Pereira et al., 2017; Parkkonen et al., 2017; Platz et al., 2000; Tang et al., 2020). The beta ERD/ERS is thought to reflect regulation of intracortical inhibition (Takemi et al., 2013), although they may also arise from several other functions including motor planning and short-term memory (Kilavik et al., 2013). The changes in beta ERD may depend on the specific motor pathology (Platz et al., 2000), and may not be large enough to detect in our population of minor stroke patients. A more thorough analysis with a larger population is required to ascertain whether the beta ERD also shows a significantly reduced amplitude, like the ERS, in minor stroke patients.

#### **4.3. Beta abnormalities independent of lesion hemisphere**

We found that for minor stroke patients, the reduction in beta activity was similar in both hemispheres, in contrast to some prior stroke studies that found a greater reduction of beta

activity in the ipsi-lesional hemisphere (Bartur et al., 2019; Tecchio et al., 2006). The observed bilateral reduction in beta band activity agrees with slower reaction times for both hands on the grooved peg board task in our patient population. Indeed, disinhibition and increased corticospinal excitability have been found in both hemispheres in cases of moderate to severe hemiparesis after unilateral stroke (Manganotti et al., 2002). Correspondingly, several studies do find bilateral abnormalities in beta activity due to stroke (Graziadio et al., 2012; Manganotti et al., 2002; Shiner et al., 2015; Wilson et al., 2010), consistent with bilaterally impaired hand dexterity after unilateral stroke (Nowak et al., 2007). Several explanations for the mechanisms underlying these bilateral impairments have been proposed, including bilateral disinhibition, cortical reorganization and bilateral involvement in motor planning and execution (Graziadio et al., 2012; Schaefer et al., 2007). Additionally, these bilateral abnormalities may also indicate disruption of bilateral network connectivity even in areas without lesions (Grefkes et al., 2008; Sharma et al., 2009; Westlake and Nagarajan, 2011).

#### **4.4. Beta abnormalities are consistent across visits**

Cognitive performance and reaction times for the minor stroke patients improved when they returned for their second visit, though remained abnormal compared to controls. Beta band measures showed little improvement between visits, unlike other studies which found that improved recovery from stroke correlates with a return to healthy levels of beta band activity (Graziadio et al., 2012; Parkkonen et al., 2018; Tang et al., 2020). However, most of these studies involved patients with moderate to severe motor impairments, and may not be comparable to our population of patients with only minor motor deficiencies. In our case, patients still performed slower than average on the grooved peg board task even for the 2<sup>nd</sup> visit,

indicating a persistent reduction in dexterity despite some improvement. The changes in beta band measures during recovery from minor strokes may be quite small, and perhaps longer studies (>1 year postinfarct) are needed to detect such recovery effects. Alternatively, beta band abnormalities may persist due to mechanisms with long-term effects, such as network disruption (Nicolas et al., 2021).

In summary, we show that MEG beta band activity is a meaningful measure of motor deficits other than weakness in patients with minor stroke. The bilateral reduction in beta activity agrees with patients displaying an overall slowness and reduced dexterity in both hands and illustrates that even small infarcts may have bilateral impacts on motor function and sensorimotor activation, reflected in abnormal beta band activity. Prior studies indicate that these abnormalities are linked to a disruption of network connectivity or a global disinhibition of sensorimotor cortex, perhaps due to neural reorganization and compensatory mechanisms (Liepert et al., 2000; Manganotti et al., 2002; Rau et al., 2003; Shimizu et al., 2002). This study has a limited number of subjects due to the need to stop recruitment during a pandemic. We could not disentangle the composite mechanisms causing this abnormal beta activity, nor could we detect neural correlates of motor performance and improvement with time, perhaps because of the small sample size. Future studies with larger populations of minor stroke patients and more complex motor task designs could shed light on the underlying causes of abnormal beta band activity. Nevertheless, it is important to note that even patients with small infarcts without weakness display such marked reductions in rolandic beta activity that agrees with impaired dexterity and reaction times, even in the contra-lesional hemisphere. Investigating whether these small lesions far from motor cortex can alter connectivity in remote areas could provide useful

insights into the pathophysiology of these minor strokes and the mechanisms underlying bilateral motor impairments, and could lead to more effective methods of motor rehabilitation and recovery.

## References

- Ashendorf L, Vanderslice-Barr JL, McCaffrey RJ. Motor tests and cognition in healthy older adults. *Applied Neuropsychology* 2009;16:171–6. <https://doi.org/10.1080/09084280903098562>.
- Bartur G, Pratt H, Soroker N. Changes in mu and beta amplitude of the EEG during upper limb movement correlate with motor impairment and structural damage in subacute stroke. *Clinical Neurophysiology* 2019;130:1644–51. <https://doi.org/10.1016/j.clinph.2019.06.008>.
- Brodbeck C. christianbrodbeck/Eelbrain. 2020.
- Brott T, Adams HP, Olinger CP, Marler JR, Barsan WG, Biller J, et al. Measurements of acute cerebral infarction: a clinical examination scale. *Stroke* 1989;20:864–70. <https://doi.org/10.1161/01.str.20.7.864>.
- Bush SS. Neurosensory Center Comprehensive Examination for Aphasia. In: Kreutzer JS, DeLuca J, Caplan B, editors. *Encyclopedia of Clinical Neuropsychology*, New York, NY: Springer; 2011, p. 1772–3. [https://doi.org/10.1007/978-0-387-79948-3\\_204](https://doi.org/10.1007/978-0-387-79948-3_204).
- Cheyne DO. MEG studies of sensorimotor rhythms: A review. *Experimental Neurology* 2013;245:27–39. <https://doi.org/10.1016/j.expneurol.2012.08.030>.
- Desikan RS, Ségonne F, Fischl B, Quinn BT, Dickerson BC, Blacker D, et al. An automated labeling system for subdividing the human cerebral cortex on MRI scans into gyral based regions of interest. *NeuroImage* 2006;31:968–80. <https://doi.org/10.1016/j.neuroimage.2006.01.021>.
- Eder CF, Sokić D, Čovićković Šternić N, Mijajlović M, Savić M, Sinkjær T, et al. Symmetry of post-movement beta-ERS and motor recovery from stroke: a low-resolution EEG pilot study. *European Journal of Neurology* 2006;13:1312–23. <https://doi.org/10.1111/j.1468-1331.2006.01550.x>.
- Engel AK, Fries P. Beta-band oscillations—signalling the status quo? *Current Opinion in Neurobiology* 2010;20:156–65. <https://doi.org/10.1016/j.conb.2010.02.015>.
- Fischl B. FreeSurfer. *NeuroImage* 2012;62:774–81. <https://doi.org/10.1016/j.neuroimage.2012.01.021>.
- Gramfort A. MEG and EEG data analysis with MNE-Python. *Frontiers in Neuroscience* 2013;7. <https://doi.org/10.3389/fnins.2013.00267>.

- Gramfort A, Luessi M, Larson E, Engemann DA, Strohmeier D, Brodbeck C, et al. MNE software for processing MEG and EEG data. *NeuroImage* 2014;86:446–60. <https://doi.org/10.1016/j.neuroimage.2013.10.027>.
- Graziadio S, Tomasevic L, Assenza G, Tecchio F, Eyre JA. The myth of the ‘unaffected’ side after unilateral stroke: Is reorganisation of the non-infarcted corticospinal system to re-establish balance the price for recovery? *Experimental Neurology* 2012;238:168–75. <https://doi.org/10.1016/j.expneurol.2012.08.031>.
- Grefkes C, Nowak DA, Eickhoff SB, Dafotakis M, Küst J, Karbe H, et al. Cortical connectivity after subcortical stroke assessed with functional magnetic resonance imaging. *Annals of Neurology* 2008;63:236–46. <https://doi.org/10.1002/ana.21228>.
- Hämäläinen MS, Ilmoniemi RJ. Interpreting magnetic fields of the brain: minimum norm estimates. *Med Biol Eng Comput* 1994;32:35–42. <https://doi.org/10.1007/BF02512476>.
- Hari R, Forss N, Avikainen S, Kirveskari E, Salenius S, Rizzolatti G. Activation of human primary motor cortex during action observation: A neuromagnetic study. *Proceedings of the National Academy of Sciences* 1998;95:15061–5. <https://doi.org/10.1073/pnas.95.25.15061>.
- Heinrichs-Graham E, Wilson TW, Santamaria PM, Heithoff SK, Torres-Russotto D, Hutter-Saunders JAL, et al. Neuromagnetic Evidence of Abnormal Movement-Related Beta Desynchronization in Parkinson’s Disease. *Cerebral Cortex* 2014;24:2669–78. <https://doi.org/10.1093/cercor/bht121>.
- Kelly-Hayes M, Beiser A, Kase CS, Scaramucci A, D’Agostino RB, Wolf PA. The influence of gender and age on disability following ischemic stroke: the Framingham study. *Journal of Stroke and Cerebrovascular Diseases* 2003;12:119–26. [https://doi.org/10.1016/S1052-3057\(03\)00042-9](https://doi.org/10.1016/S1052-3057(03)00042-9).
- Kilavik BE, Zaepffel M, Brovelli A, MacKay WA, Riehle A. The ups and downs of beta oscillations in sensorimotor cortex. *Experimental Neurology* 2013;245:15–26. <https://doi.org/10.1016/j.expneurol.2012.09.014>.
- Kuznetsova A, Brockhoff PB, Christensen RHB. lmerTest Package: Tests in Linear Mixed Effects Models. *Journal of Statistical Software* 2017;82:1–26. <https://doi.org/10.18637/jss.v082.i13>.
- Leocani L, Comi G. Movement-related event-related desynchronization in neuropsychiatric disorders. In: Neuper C, Klimesch W, editors. *Progress in Brain Research*, vol. 159, Elsevier; 2006, p. 351–66. [https://doi.org/10.1016/S0079-6123\(06\)59023-5](https://doi.org/10.1016/S0079-6123(06)59023-5).
- Liepert J, Storch P, Fritsch A, Weiller C. Motor cortex disinhibition in acute stroke. *Clinical Neurophysiology* 2000;111:671–6. [https://doi.org/10.1016/S1388-2457\(99\)00312-0](https://doi.org/10.1016/S1388-2457(99)00312-0).
- Manganotti P, Patuzzo S, Cortese F, Palermo A, Smania N, Fiaschi A. Motor disinhibition in affected and unaffected hemisphere in the early period of recovery after stroke. *Clinical Neurophysiology* 2002;113:936–43. [https://doi.org/10.1016/S1388-2457\(02\)00062-7](https://doi.org/10.1016/S1388-2457(02)00062-7).
- Marsh EB, Brodbeck C, Llinas RH, Mallick D, Kulasingham JP, Simon JZ, et al. Poststroke acute dysexecutive syndrome, a disorder resulting from minor stroke due to disruption of network dynamics. *PNAS* 2020;117:33578–85. <https://doi.org/10.1073/pnas.2013231117>.

- Monge-Pereira E, Molina-Rueda F, Rivas-Montero FM, Ibáñez J, Serrano JI, Alguacil-Diego IM, et al. Electroencephalography as a post-stroke assessment method: An updated review. *Neurología (English Edition)* 2017;32:40–9. <https://doi.org/10.1016/j.nrleng.2014.07.004>.
- Nasreddine ZS, Phillips NA, Bédirian V, Charbonneau S, Whitehead V, Collin I, et al. The Montreal Cognitive Assessment, MoCA: a brief screening tool for mild cognitive impairment. *J Am Geriatr Soc* 2005;53:695–9. <https://doi.org/10.1111/j.1532-5415.2005.53221.x>.
- Nicolas K, Goodin P, Visser MM, Michie PT, Bivard A, Levi C, et al. Altered Functional Connectivity and Cognition Persists 4 Years After a Transient Ischemic Attack or Minor Stroke. *Frontiers in Neurology* 2021;12:836. <https://doi.org/10.3389/fneur.2021.612177>.
- Nowak DA, Grefkes C, Dafotakis M, Küst J, Karbe H, Fink GR. Dexterity is impaired at both hands following unilateral subcortical middle cerebral artery stroke. *Eur J Neurosci* 2007;25:3173–84. <https://doi.org/10.1111/j.1460-9568.2007.05551.x>.
- Parkkonen E, Laaksonen K, Parkkonen L, Forss N. Recovery of the 20 Hz Rebound to Tactile and Proprioceptive Stimulation after Stroke. *Neural Plasticity* 2018;2018:e7395798. <https://doi.org/10.1155/2018/7395798>.
- Parkkonen E, Laaksonen K, Piitulainen H, Pekkola J, Parkkonen L, Tatlisumak T, et al. Strength of ~20-Hz Rebound and Motor Recovery After Stroke. *Neurorehabil Neural Repair* 2017;31:475–86. <https://doi.org/10.1177/1545968316688795>.
- Pfurtscheller G, Lopes da Silva FH. Event-related EEG/MEG synchronization and desynchronization: basic principles. *Clinical Neurophysiology* 1999;110:1842–57. [https://doi.org/10.1016/S1388-2457\(99\)00141-8](https://doi.org/10.1016/S1388-2457(99)00141-8).
- Pfurtscheller G, Neuper C, Brunner C, da Silva FL. Beta rebound after different types of motor imagery in man. *Neuroscience Letters* 2005;378:156–9. <https://doi.org/10.1016/j.neulet.2004.12.034>.
- Pfurtscheller G, Stancák A, Neuper C. Post-movement beta synchronization. A correlate of an idling motor area? *Electroencephalography and Clinical Neurophysiology* 1996;98:281–93. [https://doi.org/10.1016/0013-4694\(95\)00258-8](https://doi.org/10.1016/0013-4694(95)00258-8).
- Platz T, Kim IH, Pintschovius H, Winter T, Kieselbach A, Villringer K, et al. Multimodal EEG analysis in man suggests impairment-specific changes in movement-related electric brain activity after stroke. *Brain* 2000;123 Pt 12:2475–90. <https://doi.org/10.1093/brain/123.12.2475>.
- Platz T, Prass K, Denzler P, Bock S, Mauritz K-H. Testing a motor performance series and a kinematic motion analysis as measures of performance in high-functioning stroke patients: Reliability, validity, and responsiveness to therapeutic intervention. *Archives of Physical Medicine and Rehabilitation* 1999;80:270–7. [https://doi.org/10.1016/S0003-9993\(99\)90137-5](https://doi.org/10.1016/S0003-9993(99)90137-5).
- R Core Team. R: A Language and Environment for Statistical Computing. Vienna, Austria: R Foundation for Statistical Computing; 2020.
- Rankin J. Cerebral Vascular Accidents in Patients over the Age of 60: II. Prognosis. *Scott Med J* 1957;2:200–15. <https://doi.org/10.1177/003693305700200504>.



- Rau C, Plewnia C, Hummel F, Gerloff C. Event-related desynchronization and excitability of the ipsilateral motor cortex during simple self-paced finger movements. *Clinical Neurophysiology* 2003;114:1819–26. [https://doi.org/10.1016/S1388-2457\(03\)00174-3](https://doi.org/10.1016/S1388-2457(03)00174-3).
- Rossiter HE, Boudrias M-H, Ward NS. Do movement-related beta oscillations change after stroke? *Journal of Neurophysiology* 2014;112:2053–8. <https://doi.org/10.1152/jn.00345.2014>.
- Satterthwaite FE. An Approximate Distribution of Estimates of Variance Components. *Biometrics Bulletin* 1946;2:110–4. <https://doi.org/10.2307/3002019>.
- Schaefer SY, Haaland KY, Sainburg RL. Ipsilesional motor deficits following stroke reflect hemispheric specializations for movement control. *Brain* 2007;130:2146–58. <https://doi.org/10.1093/brain/awm145>.
- Sharma N, Baron J-C, Rowe JB. Motor imagery after stroke: Relating outcome to motor network connectivity. *Annals of Neurology* 2009;66:604–16. <https://doi.org/10.1002/ana.21810>.
- Shimizu T, Hosaki A, Hino T, Sato M, Komori T, Hirai S, et al. Motor cortical disinhibition in the unaffected hemisphere after unilateral cortical stroke. *Brain* 2002;125:1896–907. <https://doi.org/10.1093/brain/awf183>.
- Shiner CT, Tang H, Johnson BW, McNulty PA. Cortical beta oscillations and motor thresholds differ across the spectrum of post-stroke motor impairment, a preliminary MEG and TMS study. *Brain Research* 2015;1629:26–37. <https://doi.org/10.1016/j.brainres.2015.09.037>.
- Solis-Escalante T, Müller-Putz GR, Pfurtscheller G, Neuper C. Cue-induced beta rebound during withholding of overt and covert foot movement. *Clinical Neurophysiology* 2012;123:1182–90. <https://doi.org/10.1016/j.clinph.2012.01.013>.
- Takemi M, Masakado Y, Liu M, Ushiba J. Event-related desynchronization reflects downregulation of intracortical inhibition in human primary motor cortex. *J Neurophysiol* 2013;110:1158–66. <https://doi.org/10.1152/jn.01092.2012>.
- Tang C-W, Hsiao F-J, Lee P-L, Tsai Y-A, Hsu Y-F, Chen W-T, et al.  $\beta$ -Oscillations Reflect Recovery of the Paretic Upper Limb in Subacute Stroke. *Neurorehabil Neural Repair* 2020;34:450–62. <https://doi.org/10.1177/1545968320913502>.
- Taulu S, Simola J. Spatiotemporal signal space separation method for rejecting nearby interference in MEG measurements. *Phys Med Biol* 2006;51:1759–68. <https://doi.org/10.1088/0031-9155/51/7/008>.
- Tecchio F, Zappasodi F, Pasqualetti P, Tombini M, Salustri C, Oliviero A, et al. Rhythmic brain activity at rest from rolandic areas in acute mono-hemispheric stroke: A magnetoencephalographic study. *NeuroImage* 2005;28:72–83. <https://doi.org/10.1016/j.neuroimage.2005.05.051>.
- Tecchio F, Zappasodi F, Tombini M, Oliviero A, Pasqualetti P, Vernieri F, et al. Brain plasticity in recovery from stroke: An MEG assessment. *NeuroImage* 2006;32:1326–34. <https://doi.org/10.1016/j.neuroimage.2006.05.004>.



- Tzagarakis C, Ince NF, Leuthold AC, Pellizzer G. Beta-Band Activity during Motor Planning Reflects Response Uncertainty. *J Neurosci* 2010;30:11270–7. <https://doi.org/10.1523/JNEUROSCI.6026-09.2010>.
- Wade DT, Collin C. The Barthel ADL Index: a standard measure of physical disability? *Int Disabil Stud* 1988;10:64–7. <https://doi.org/10.3109/09638288809164105>.
- Westlake K, Nagarajan S. Functional Connectivity in Relation to Motor Performance and Recovery After Stroke. *Frontiers in Systems Neuroscience* 2011;5:8. <https://doi.org/10.3389/fnsys.2011.00008>.
- Wilson TW, Fleischer A, Archer D, Hayasaka S, Sawaki L. Oscillatory MEG Motor Activity Reflects Therapy-Related Plasticity in Stroke Patients: Neurorehabilitation and Neural Repair 2010. <https://doi.org/10.1177/1545968310378511>.

A

## Source Localized Beta Band Power

Controls

Patients

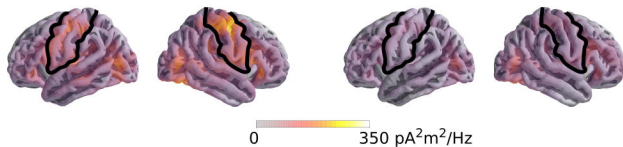

B

Response Spectrum  
1<sup>st</sup> visit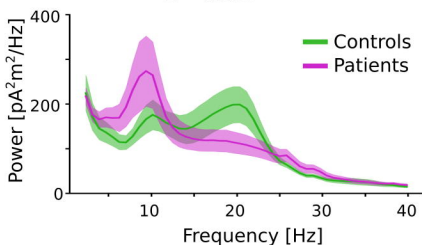

C

Relative  
Beta Power  
1<sup>st</sup> visit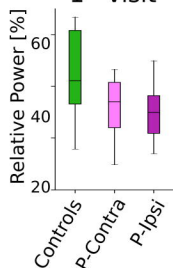

D

Response Spectrum  
2<sup>nd</sup> visit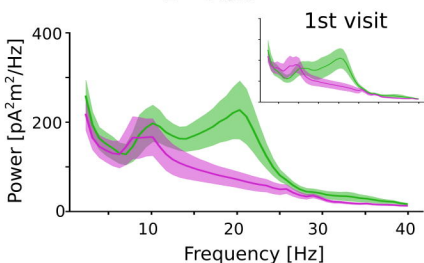

E

Relative  
Beta Power  
2<sup>nd</sup> visit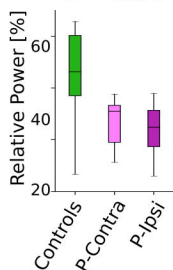

1<sup>st</sup> visit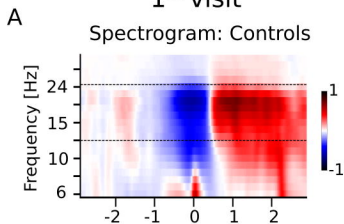2<sup>st</sup> visit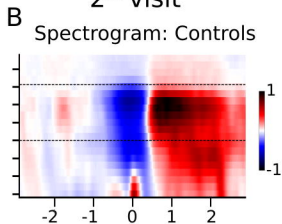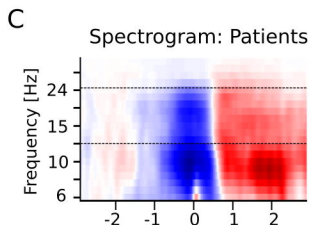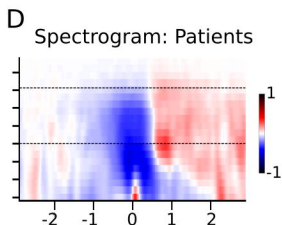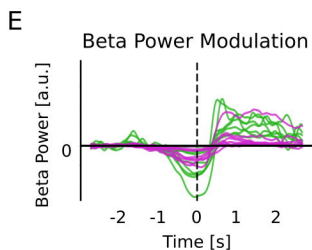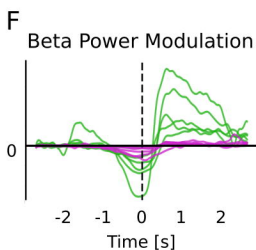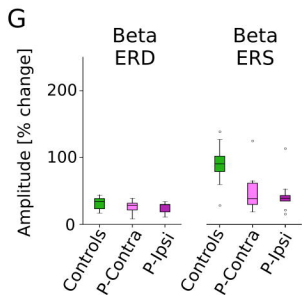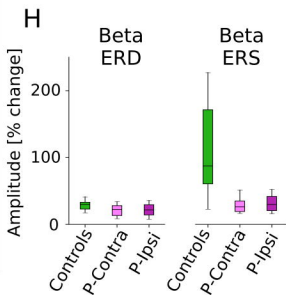

Source: https://biorxiv.org/content/10.1101/2021.10.15.464457v1.full.pdf
